# Supplementary material for: Health system’s barriers hindering implementation of public-private partnership at the district level: a case study of partnership for improved reproductive and child health services provision in Tanzania
Source: Springer Nature journal article supplement (doi:10.1186/s12913-016-1831-6), 2016-10-20
Supplement: MOESM1 [file 10937912]

**Public-Private Partnership Policy ACTOR MAP – September 2014**

|                  | <i>Proponents</i>                       |                            |                                                 | <i>Opponents</i>                 |                               | <i>Not mobilised</i>                                |
|------------------|-----------------------------------------|----------------------------|-------------------------------------------------|----------------------------------|-------------------------------|-----------------------------------------------------|
|                  | high support                            |                            | Neutral                                         | high opposition                  |                               |                                                     |
| <b>POWER</b>     | Enthusiastic Helpful<br>Compliant       |                            | Hesitant/<br>Indifferent                        | Uncooperative Opposed<br>Hostile |                               |                                                     |
| <b>Very High</b> |                                         |                            | DED<br>DPO<br>Council Social Services Committee |                                  | House of Councillors          | Non-State actors association                        |
|                  | DMO                                     |                            | Council Health Management Team (CHMT)           |                                  | Health professionals - Public |                                                     |
|                  |                                         | Parastatal Organisations   | Individual Private For-Profit                   |                                  | CHF                           |                                                     |
| <b>Medium</b>    | PPP - Coordinator<br>RCHS - Coordinator | NHIF                       | Council Health Services Board                   |                                  |                               | Ward Development Committee<br>Ward Health Committee |
|                  |                                         | CSR<br>FB Providers        | Facility Committee - Public                     |                                  |                               | NGOs Association                                    |
|                  | ADDO Association                        | NGOs                       |                                                 |                                  |                               |                                                     |
| <b>Very Low</b>  |                                         | Voluntary services<br>TBAs |                                                 |                                  |                               |                                                     |
