# Supplementary material for: Health system’s barriers hindering implementation of public-private partnership at the district level: a case study of partnership for improved reproductive and child health services provision in Tanzania
Source: Springer Nature journal article supplement (doi:10.1186/s12913-016-1831-6), 2016-10-20
Supplement: MOESM2 [file 10937912]

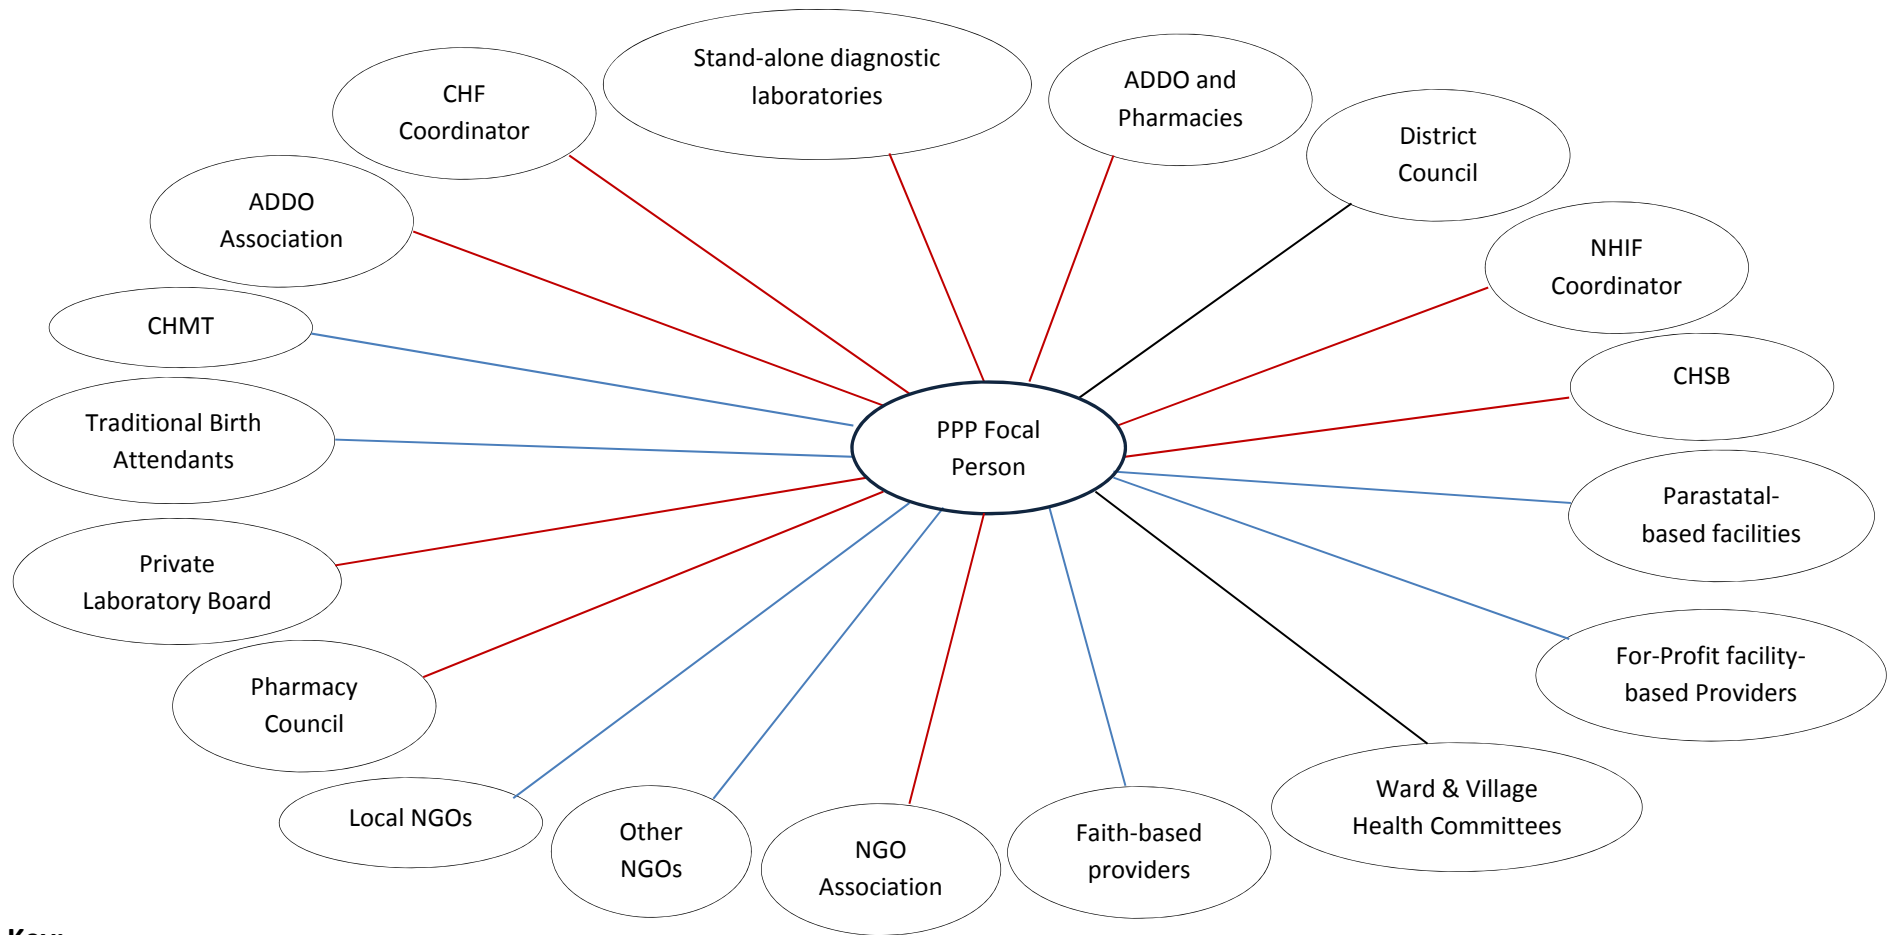

**Key:**

- Fairly good relationship
- Some improvement required
- Opportunity for a relationship (none currently exist)
